# Supplementary material for: Immunomodulatory Role of NK Cells during Antiviral Antibody Therapy
Source: MDPI journal article supplement (doi:10.3390/vaccines9020137), 2021-02-08
Supplement: s1 [file s1]

## Supplementary Figures and Figure Legends

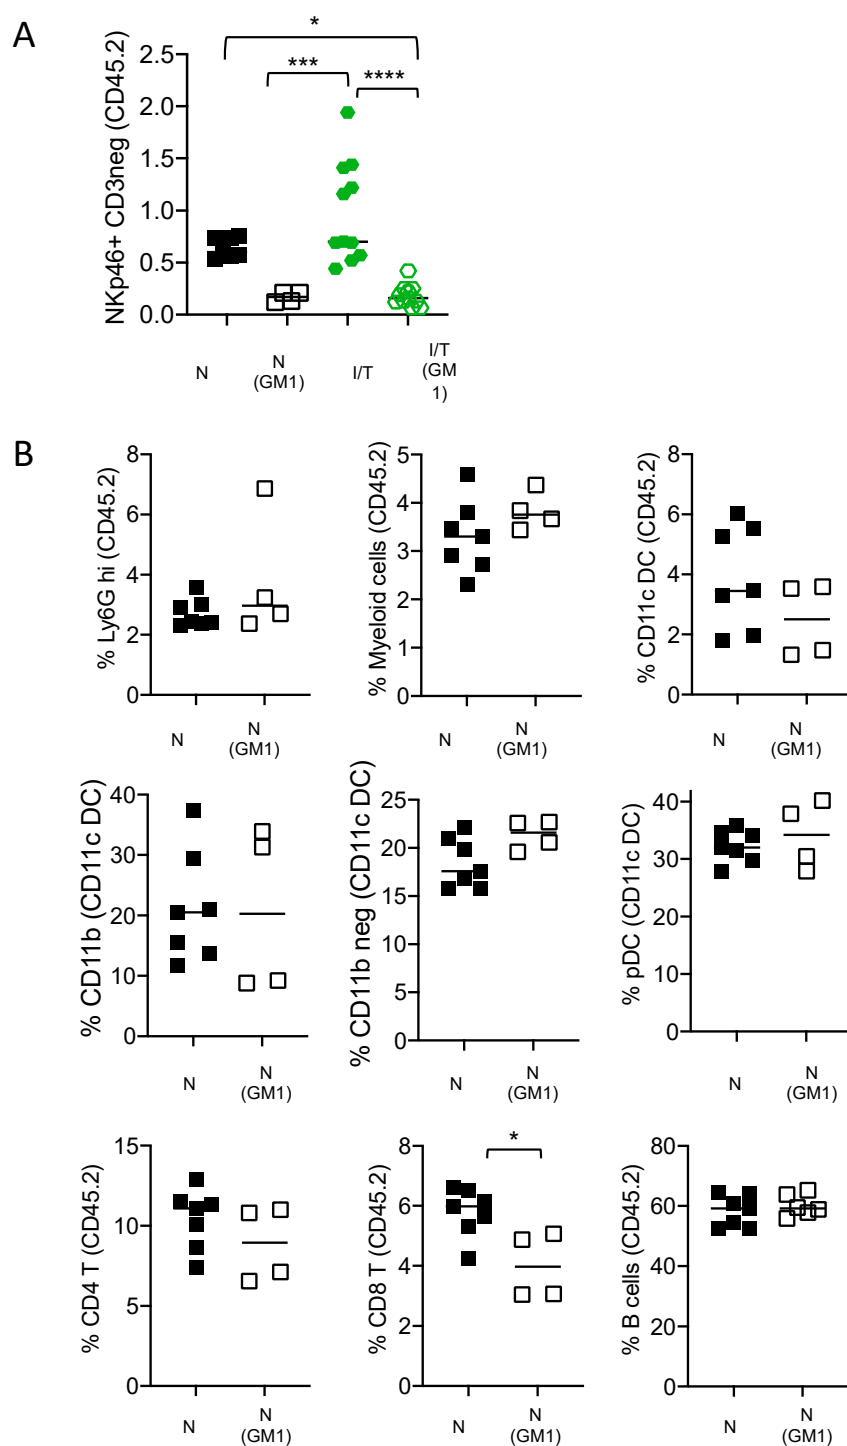

**Supplementary Figure 1. (A)** Efficacy of NK depletion by the anti-asialo-GM1 antibody in naïve and infected/treated mice. Mice were infected with the FrCasE retrovirus and treated with the 667 mAb as in Figure 1. The anti-asialo-GM1 antibody was injected 1 day before infection and at days 1, 7, 13 and 19 p.i. Naïve mice received equivalent anti-asialo-GM1 antibody treatment (same number of doses and same quantity of depleting antibody per dose). Efficiency of NK cell depletion was 1 day after the last anti-asialo-GM1 antibody administration (i.e., at 14 days p.i.). The data correspond to 3 independent experiments with the

following number of mice per group: naïve (N) ( $n=7$ ); naïve-GM1 (N-GM1)( $n=4$ ); infected/treated (I/T) ( $n=11$ ), infected/treated-GM1 (I/T GM1) ( $n=11$ ); **(B)** effect of NK cell depletion in the frequency of splenic immune cells in naïve mice. Frequency of immune cells in the spleen at 1 day after anti-asialo-GM1 antibody administration was measured in the CD45.2<sup>+</sup> leukocytic population. The data correspond to at least 3 independent experiments with the following number of mice per group: naïve (N) ( $n=7$ ); naïve GM-1 ( $n=14$ ) ( $*p < 0.05$ ;  $***p < 0.001$ ,  $****p < 0.0001$ ).

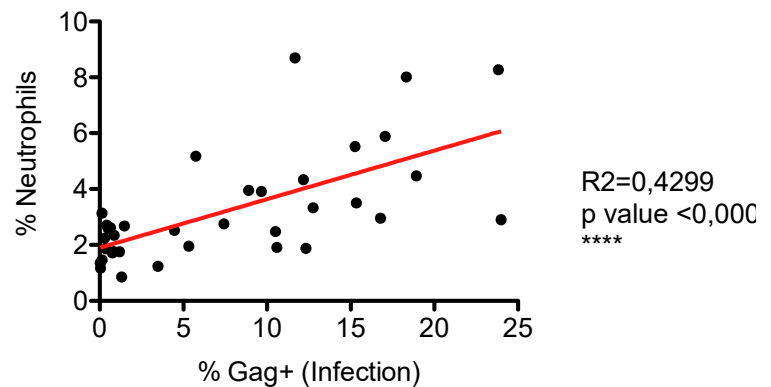

**Supplementary Figure 2.** Correlation between the frequency of splenic neutrophils isolated from FrCasE-infected mice and the frequency of FrCasE infected cells at day 14 p.i. Correlation was analyzed using the Pearson correlation test. The data correspond to 3 independent experiments ( $****p < 0.0001$ ).

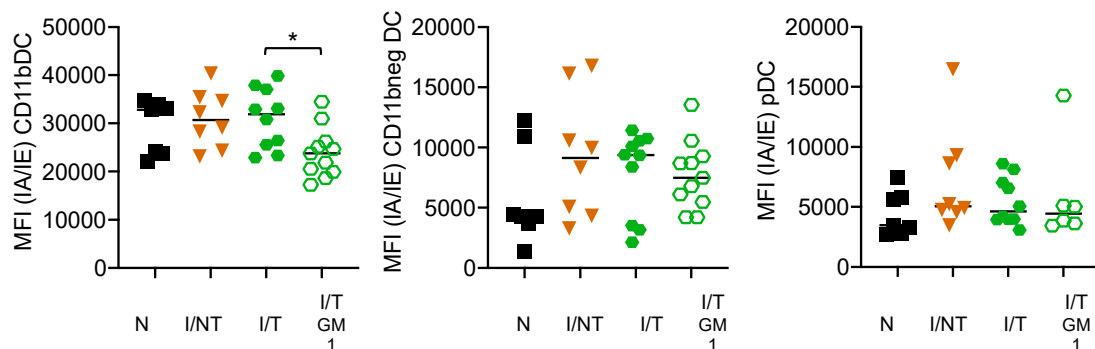

**Supplementary Figure 3.** Effects of NK cell depletion on the expression of the MHC-II molecule (IA/IE) on DCs. NK cells in infected/treated mice were depleted, or not, as indicated in Figure 2A. Spleen cells were isolated at day 14 p.i. and flow cytometry-analyzed to assess the expression levels of MHC-II on different subtypes of DC. The data correspond to 3 independent experiments ( $*p < 0.05$ ).
